# Supplementary material for: Adipokines expression in reproductive tract, egg white and embryonic annexes in hen
Source: PubMed Central journal article supplement — Poult Sci. 2023 Jul 3;102(10):102908. doi: 10.1016/j.psj.2023.102908 (PMC10387612; doi:10.1016/j.psj.2023.102908), 2023-07-03

A.

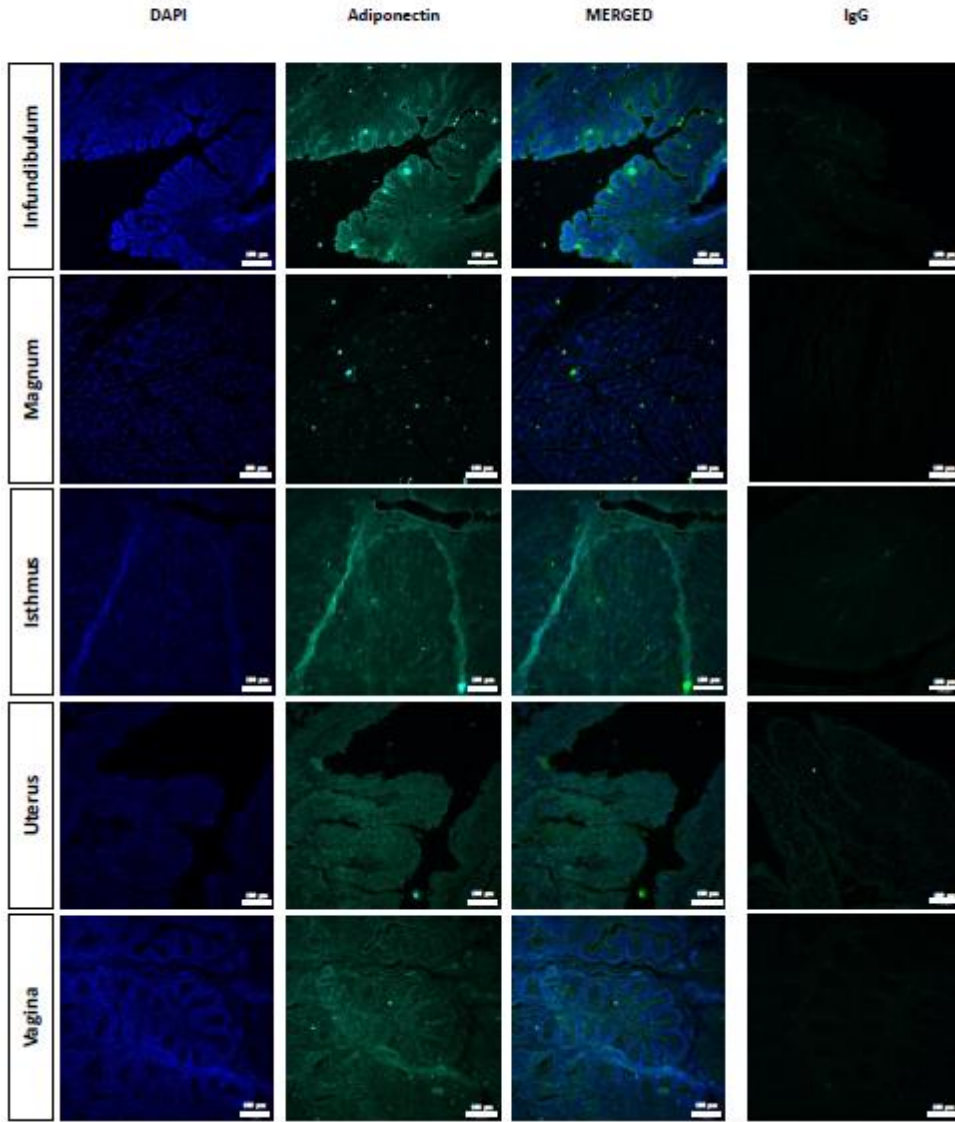

B.

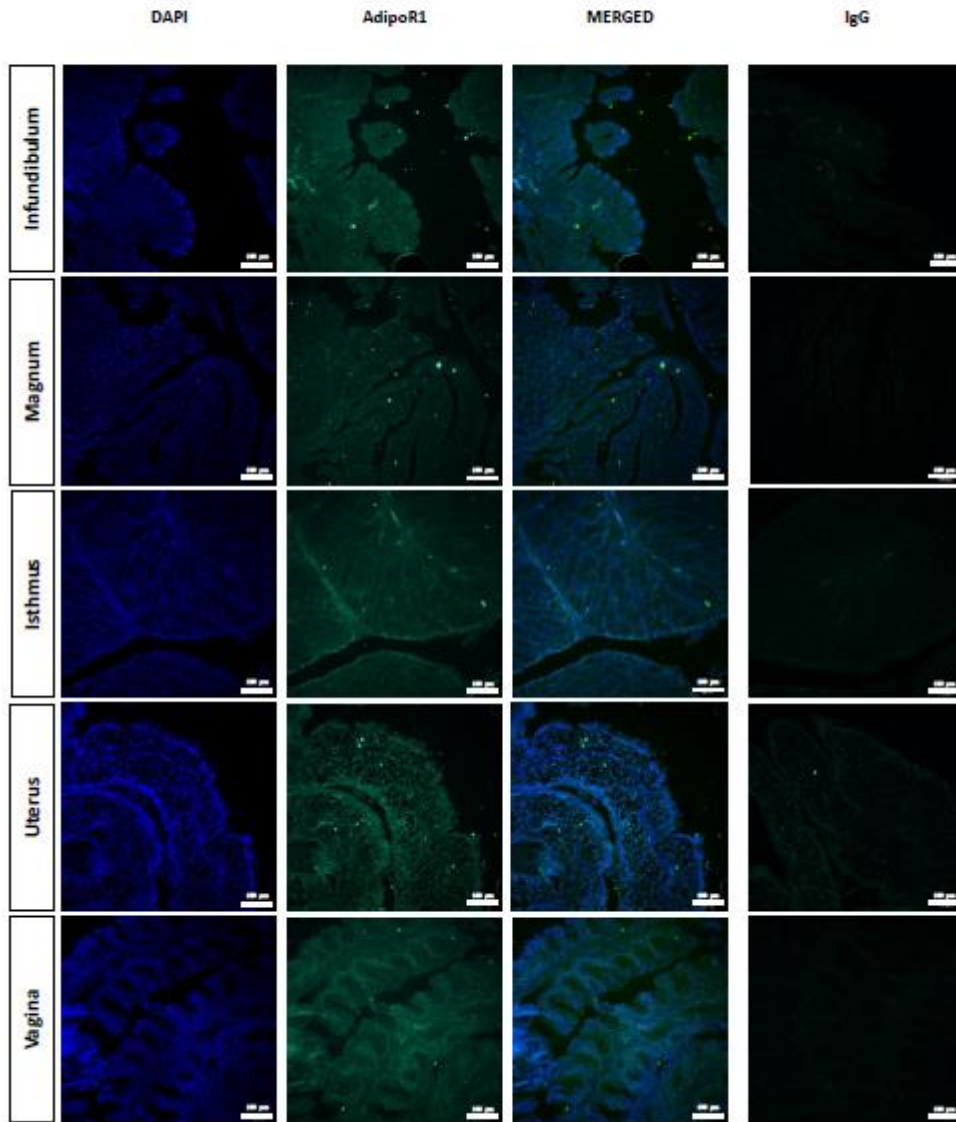

C.

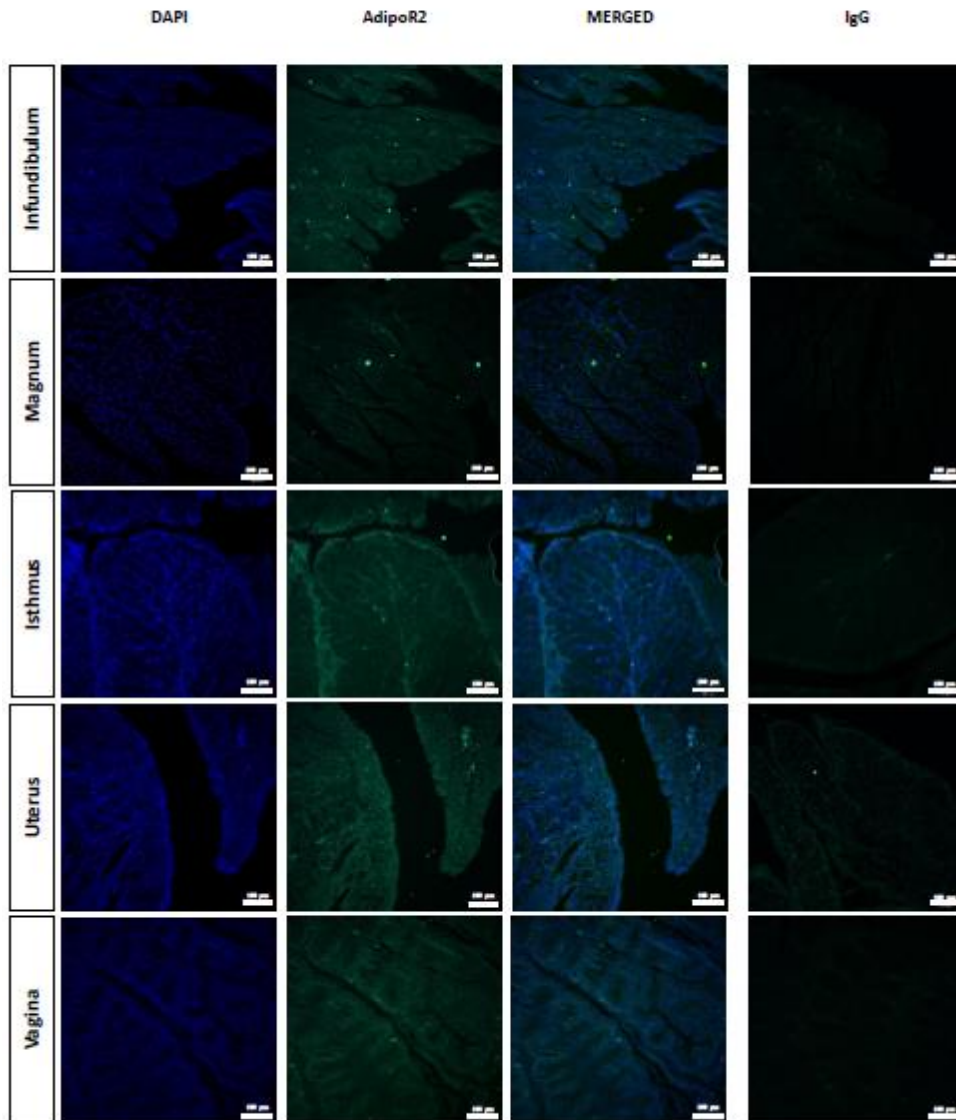

Figure 1 Supplementary data

D.

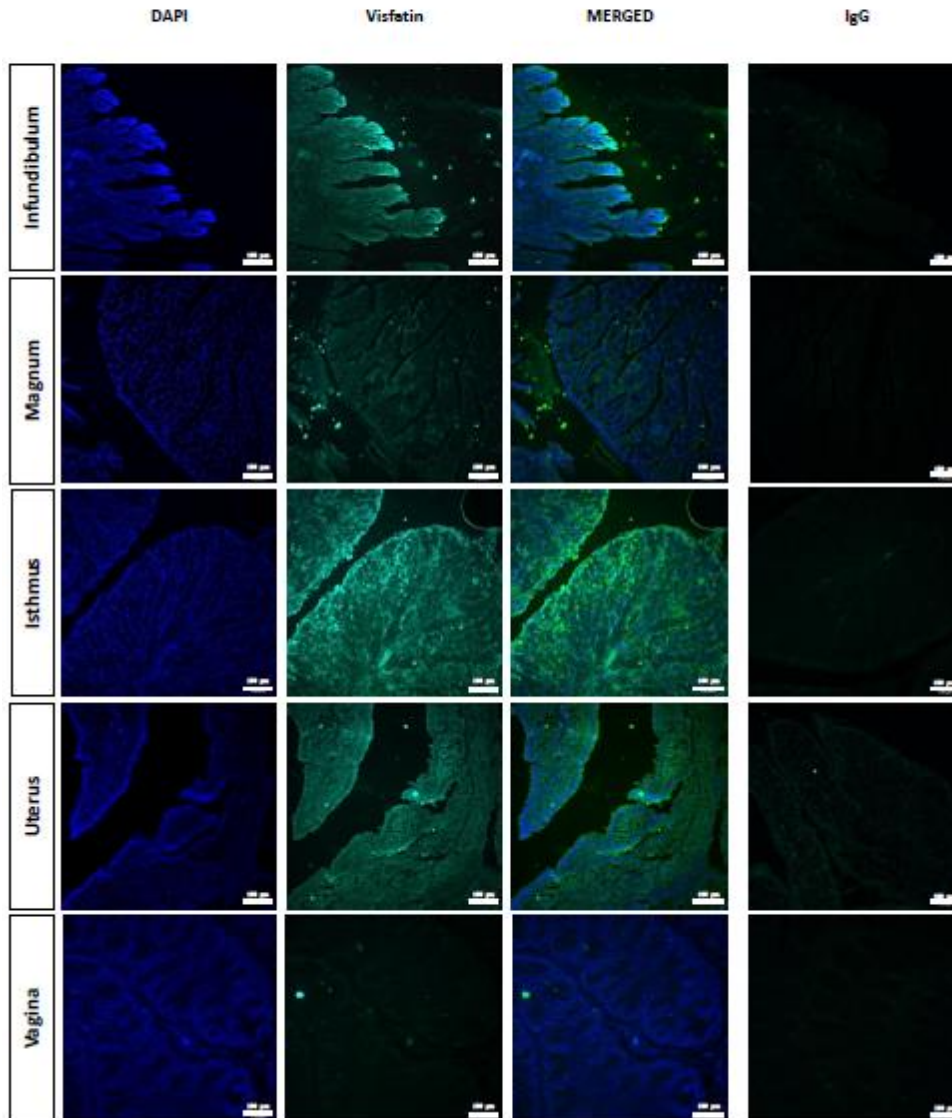

Figure 1 Supplementary data

E.

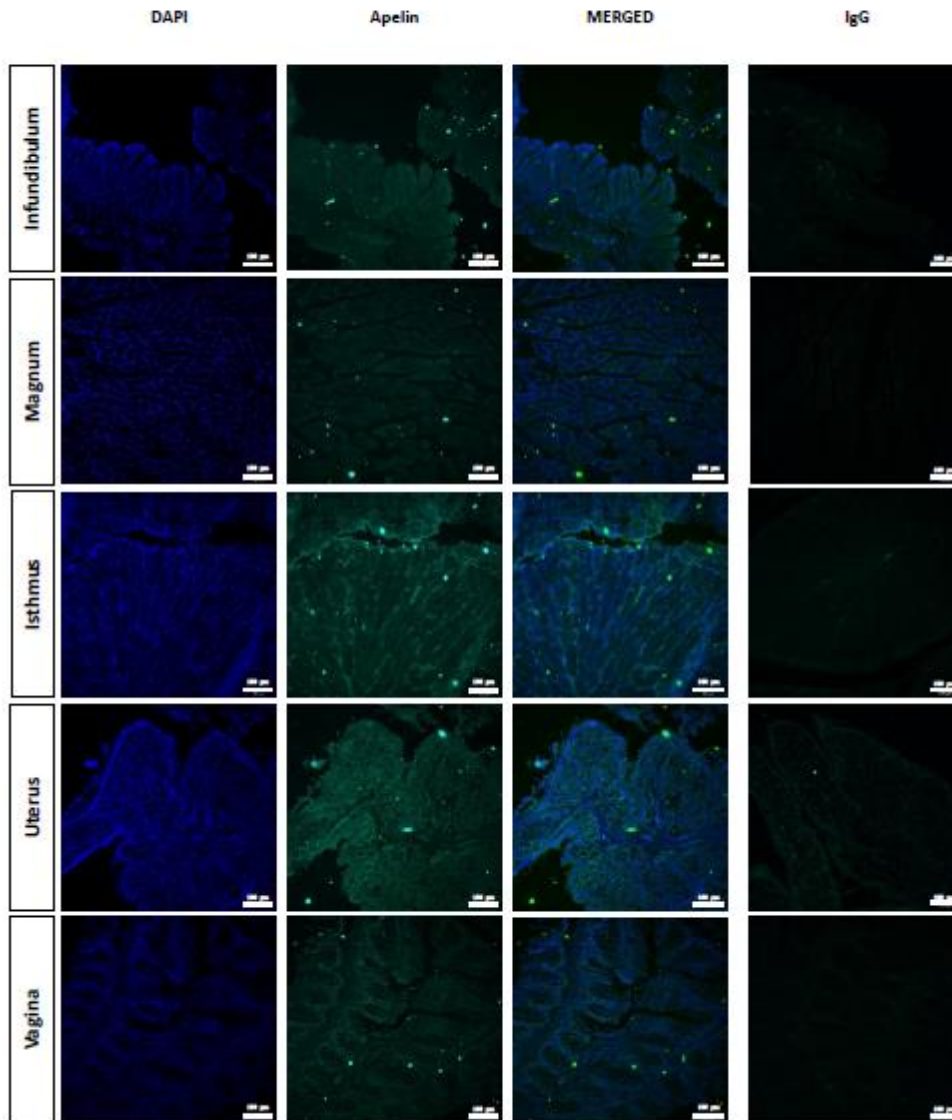



Figure 1 Supplementary data

F.

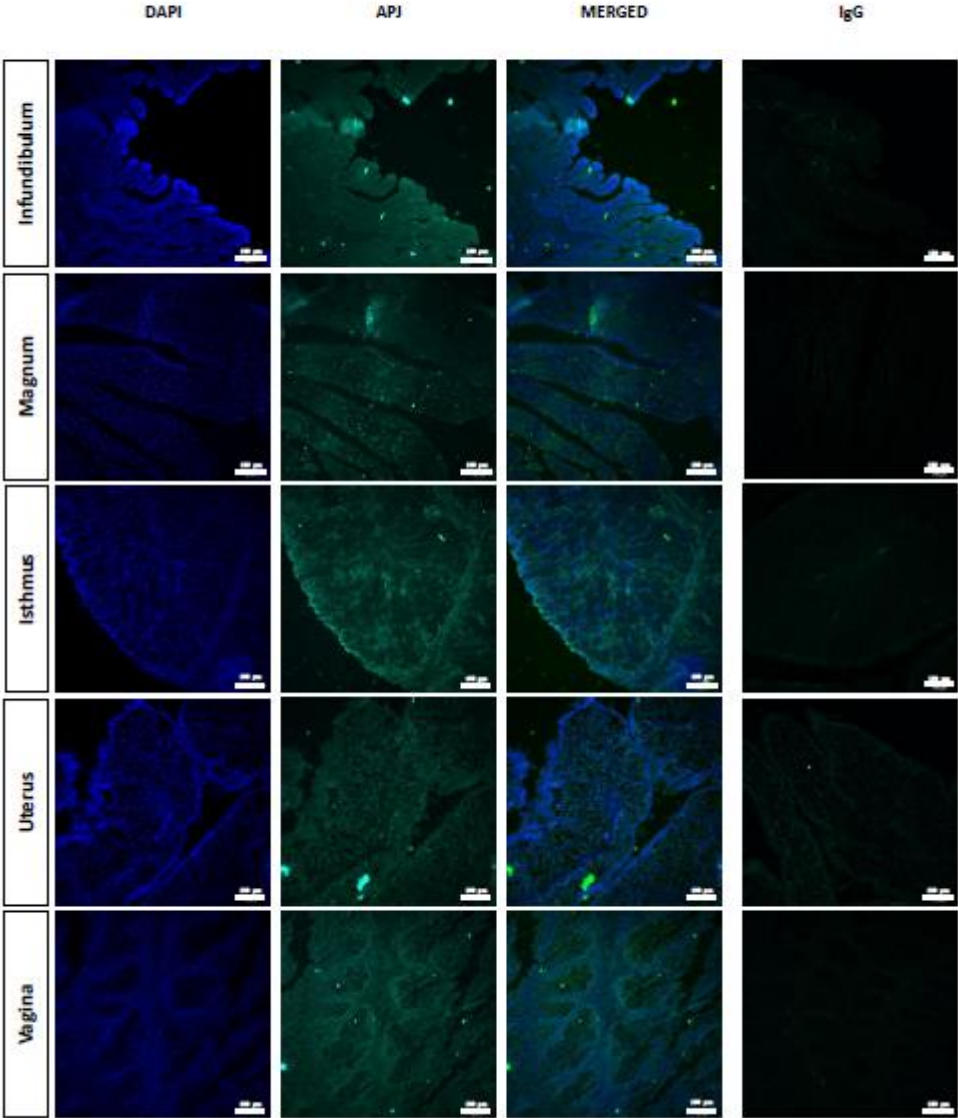

Figure 1 Supplementary data

G.

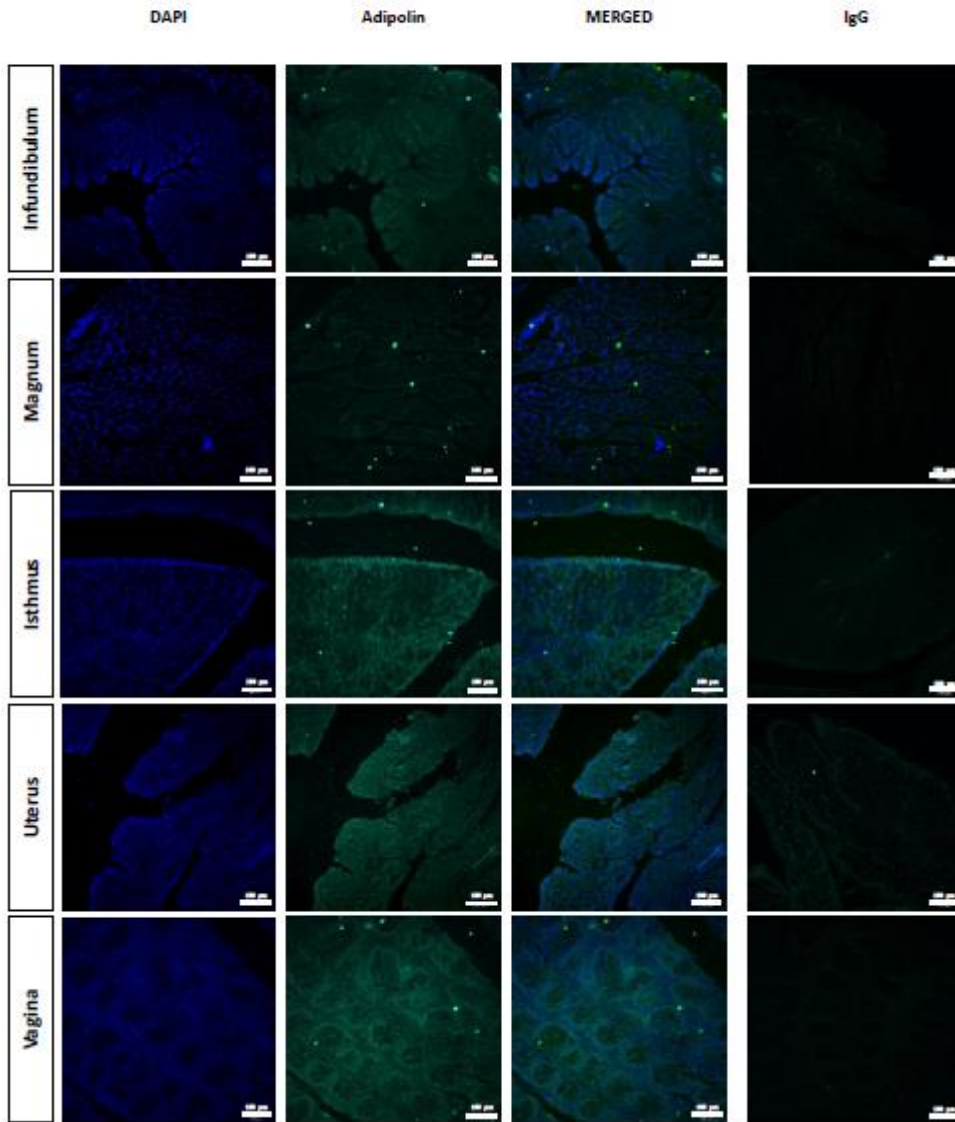

Figure 2 Supplementary data

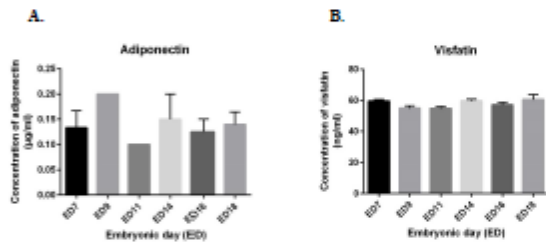

Supplement: mmc1.pdf [file mmc1.pdf]
